# Supplementary material for: Cabozantinib‐nivolumab sequence in metastatic renal cell carcinoma: The CABIR study
Source: PubMed Central journal article supplement (PMC9541795; doi:10.1002/ijc.34126), 2022-06-06
Supplement: IJC-151-1335-s001.pdf [file IJC-151-1335-s001.pdf]

**Supplementary Material**

**Cabozantinib-nivolumab sequence in metastatic renal cell carcinoma: the CABIR study**

Yann-Alexandre Vano, MD; Letuan Phan, PhD; Gwenaëlle Gravis, MD; Iphigénie Korakis, MD; Friederike Schlürmann, MD; Denis Maillet, MD; Mostefa Bennamoun, MD; Nadine Houede, MD; Delphine Topart, MD; Delphine Borchiellini, MD; Philippe Barthelemy, MD; Raffaele Ratta, MD; Thomas Rycckewaert, MD; Ali Hasbini, MD; Sophie Hans, MD; Sheik Emambux, MD; Sandra Cournier; Elena Braychenko; Réza-Thierry Elaidi, PhD; Stéphane Oudard, MD.

Table of contents

**SUPPLEMENTARY TABLES..... 2**

**TABLE S1 – PATIENTS’ CHARACTERISTICS AT 3<sup>RD</sup> LINE (MATCHED POPULATION)..... 2**

**TABLE S2 – EFFICACY OF CABOZANTINIB-NIVOLUMAB SEQUENCE ACCORDING TO DURATION OF VEGFR-TKI IN 1<sup>ST</sup> LINE..... 3**

**TABLE S3 – EFFICACY OF NIVOLUMAB-CABOZANTINIB SEQUENCE ACCORDING TO DURATION OF VEGFR-TKI IN 1<sup>ST</sup> LINE..... 4**

**SUPPLEMENTARY FIGURES..... 5**

**FIGURE S1 – PROPENSITY SCORE DISTRIBUTION IN OVERALL POPULATION ..... 5**

**FIGURE S2 – PROPENSITY SCORE DISTRIBUTION IN MATCHED POPULATION ..... 6**

**FIGURE S3 –OVERALL SURVIVAL IN 2<sup>ND</sup> LINE (OS<sub>2</sub>) IN MATCHED 1:1 POPULATION..... 7**

**FIGURE S4 –OVERALL SURVIVAL IN 2<sup>ND</sup> LINE (OS<sub>2</sub>) BY 1<sup>ST</sup> LINE DURATION SUBGROUPS IN MATCHED 1:1 POPULATION ..... 8**

## Supplementary tables

**Table S1** – Patients’ characteristics at 3<sup>rd</sup> line (matched population)

| Variable                                   | N  | CN, N = 38    | NC, N = 38    | p-value <sup>1</sup> |
|--------------------------------------------|----|---------------|---------------|----------------------|
| <b>Duration of 2nd line</b>                | 76 |               |               | 0.29                 |
| Median [IQR]                               |    | 7 [3, 12]     | 6 [3, 10]     |                      |
| <b>Responder during 2nd line</b>           | 76 |               |               | 0.22                 |
| Yes                                        |    | 8 / 38 (21%)  | 4 / 38 (11%)  |                      |
| No                                         |    | 29 / 38 (76%) | 34 / 38 (89%) |                      |
| Not evaluable                              |    | 1 / 38 (2.6%) | 0 / 38 (0%)   |                      |
| <b>Reason for 2nd line discontinuation</b> | 76 |               |               | 0.67                 |
| Investigator's choice                      |    | 0 / 38 (0%)   | 1 / 38 (2.6%) |                      |
| Progression                                |    | 34 / 38 (89%) | 35 / 38 (92%) |                      |
| Toxicity                                   |    | 4 / 38 (11%)  | 2 / 38 (5.3%) |                      |
| <b>IMDC at 3rd line start</b>              | 76 |               |               | 0.57                 |
| Good                                       |    | 4 / 38 (11%)  | 2 / 38 (5.3%) |                      |
| Intermediate                               |    | 19 / 38 (50%) | 23 / 38 (61%) |                      |
| Poor                                       |    | 15 / 38 (39%) | 13 / 38 (34%) |                      |
| <b>ECOG PS at 3rd line start</b>           | 73 |               |               | 0.93                 |
| 0                                          |    | 6 / 36 (17%)  | 6 / 37 (16%)  |                      |
| 1                                          |    | 20 / 36 (56%) | 18 / 37 (49%) |                      |
| 2                                          |    | 8 / 36 (22%)  | 10 / 37 (27%) |                      |
| 3                                          |    | 2 / 36 (5.6%) | 3 / 37 (8.1%) |                      |
| Unknown                                    |    | 2             | 1             |                      |

<sup>1</sup>Wilcoxon rank sum test; Fisher's exact test  
*CN: cabozantinib-nivolumab sequence; NC: nivolumab-cabozantinib sequence; IMDC: international metastatic RCC database consortium; ECOG PS: eastern cooperative oncology group performance status; IQR: interquartile range.*

**Caption:** Patients’ characteristics in 1:1 matched population (n=38) before the beginning of the third line treatment.

**Table S2** – Efficacy of cabozantinib-nivolumab sequence according to duration of VEGFR-TKI in 1<sup>st</sup> line

|                          | Best response (RECIST 1.1) |                  |                 |                  |                  |                  | Median Survival      |                             |                      |
|--------------------------|----------------------------|------------------|-----------------|------------------|------------------|------------------|----------------------|-----------------------------|----------------------|
|                          | Treatment                  | CR               | PR              | SD               | PD               | NE               | P-value <sup>1</sup> | Median PFS, months (95% CI) | P-value <sup>2</sup> |
| <b>In 2nd line</b>       | Cabo                       |                  |                 |                  |                  |                  | 0.005                |                             | 0.044                |
| VEGFR-TKI < 6 mo         | Cabo                       | 0 / 7<br>(0%)    | 1 / 7<br>(14%)  | 2 / 7<br>(29%)   | 4 / 7<br>(57%)   | 0 / 7<br>(0%)    |                      | 4.0 (2.8 to NE)             |                      |
| 6 mo < VEGFR-TKI < 18 mo | Cabo                       | 0 / 18<br>(0%)   | 0 / 18<br>(0%)  | 11 / 18<br>(61%) | 6 / 18<br>(33%)  | 1 / 18<br>(5.6%) |                      | 7.1 (4.8 to 15)             |                      |
| VEGFR-TKI > 18 mo        | Cabo                       | 0 / 13<br>(0%)   | 7 / 13<br>(54%) | 4 / 13<br>(31%)  | 2 / 13<br>(15%)  | 0 / 13<br>(0%)   |                      | 12 (6.0 to NE)              |                      |
| <b>In 3rd line</b>       | Nivo                       |                  |                 |                  |                  |                  | 0.76                 |                             | 0.13                 |
| VEGFR-TKI < 6 mo         | Nivo                       | 0 / 7<br>(0%)    | 2 / 7<br>(29%)  | 1 / 7<br>(14%)   | 4 / 7<br>(57%)   | 0 / 7<br>(0%)    |                      | 5.1 (1.5 to NE)             |                      |
| 6 mo < VEGFR-TKI < 18 mo | Nivo                       | 0 / 18<br>(0%)   | 3 / 18<br>(17%) | 4 / 18<br>(22%)  | 10 / 18<br>(56%) | 1 / 18<br>(5.6%) |                      | 3.5 (2.0 to 9.2)            |                      |
| VEGFR-TKI > 18 mo        | Nivo                       | 1 / 13<br>(7.7%) | 2 / 13<br>(15%) | 4 / 13<br>(31%)  | 4 / 13<br>(31%)  | 2 / 13<br>(15%)  |                      | 12 (3.3 to NE)              |                      |
| <b>PFS<sub>2-3</sub></b> |                            |                  |                 |                  |                  |                  |                      |                             | 0.5                  |
| VEGFR-TKI < 6 mo         |                            |                  |                 |                  |                  |                  |                      | 11 (7.4 to NE)              |                      |
| 6 mo < VEGFR-TKI < 18 mo |                            |                  |                 |                  |                  |                  |                      | 14 (9.3 to NE)              |                      |
| VEGFR-TKI > 18 mo        |                            |                  |                 |                  |                  |                  |                      | 23 (11 to NE)               |                      |

<sup>1</sup>Fisher's exact test ; <sup>2</sup>Log-rank test

*Cabo: cabozantinib; Nivo: nivolumab; VEGFR-TKI: vascular endothelial growth factor receptor tyrosine kinase inhibitor; CR: complete response; PR: partial response; SD: stable disease; PD: progressive disease; NE: not evaluable; mo: months; PFS<sub>2-3</sub>: progression-free survival from 2<sup>nd</sup> line start to progression or death during 3<sup>rd</sup> line.*

**Caption:** Best objective response and median progression-free survival (PFS) using RECIST 1.1 by investigator with cabozantinib received in second line, nivolumab received in third line, and cabozantinib-nivolumab sequence (PFS<sub>2-3</sub> only) according to duration of VEGFR-TKI treatment in first line.

**Table S3** – Efficacy of nivolumab-cabozantinib sequence according to duration of VEGFR-TKI in 1<sup>st</sup> line

|                          | Treatment | Best response (RECIST 1.1) |                  |                  |                  |                  | Median Survival      |                     |                      |
|--------------------------|-----------|----------------------------|------------------|------------------|------------------|------------------|----------------------|---------------------|----------------------|
|                          |           | CR                         | PR               | SD               | PD               | NE               | p-value <sup>1</sup> | Median PFS (95% CI) | p-value <sup>2</sup> |
| <b>In 2nd line</b>       | Nivo      |                            |                  |                  |                  |                  | 0.13                 |                     | 0.9                  |
| VEGFR-TKI < 6 mo         | Nivo      | 0 / 28<br>(0%)             | 1 / 28<br>(3.6%) | 10 / 28<br>(36%) | 16 / 28<br>(57%) | 1 / 28<br>(3.6%) |                      | 4.8 (2.4 to 7.6)    |                      |
| 6 mo < VEGFR-TKI < 18 mo | Nivo      | 0 / 43<br>(0%)             | 7 / 43<br>(16%)  | 16 / 43<br>(37%) | 20 / 43<br>(47%) | 0 / 43<br>(0%)   |                      | 5.9 (3.2 to 10)     |                      |
| VEGFR-TKI > 18 mo        | Nivo      | 0 / 30<br>(0%)             | 6 / 30<br>(20%)  | 15 / 30<br>(50%) | 9 / 30<br>(30%)  | 0 / 30<br>(0%)   |                      | 6.3 (4.6 to 8.6)    |                      |
| <b>In 3rd line</b>       | Cabo      |                            |                  |                  |                  |                  | 0.46                 |                     | 0.4                  |
| VEGFR-TKI < 6 mo         | Cabo      | 0 / 28<br>(0%)             | 11 / 28<br>(39%) | 9 / 28<br>(32%)  | 4 / 28<br>(14%)  | 4 / 28<br>(14%)  |                      | 13 (9.0 to 16)      |                      |
| 6 mo < VEGFR-TKI < 18 mo | Cabo      | 1 / 43<br>(2.3%)           | 20 / 43<br>(47%) | 16 / 43<br>(37%) | 4 / 43<br>(9.3%) | 2 / 43<br>(4.7%) |                      | 11 (9.1 to 20)      |                      |
| VEGFR-TKI > 18 mo        | Cabo      | 0 / 30<br>(0%)             | 15 / 30<br>(50%) | 13 / 30<br>(43%) | 2 / 30<br>(6.7%) | 0 / 30<br>(0%)   |                      | 16 (14 to 30)       |                      |
| <b>PFS<sub>2-3</sub></b> |           |                            |                  |                  |                  |                  |                      |                     | 0.2                  |
| VEGFR-TKI < 6 mo         |           |                            |                  |                  |                  |                  |                      | 18 (15 to 34)       |                      |
| 6 mo < VEGFR-TKI < 18 mo |           |                            |                  |                  |                  |                  |                      | 24 (18 to 38)       |                      |
| VEGFR-TKI > 18 mo        |           |                            |                  |                  |                  |                  |                      | 29 (23 to NE)       |                      |

<sup>1</sup>Fisher's exact test ; <sup>2</sup>Log-rank test

*Cabo: cabozantinib; Nivo: nivolumab; VEGFR-TKI: vascular endothelial growth factor receptor tyrosine kinase inhibitor; CR: complete response; PR: partial response; SD: stable disease; PD: progressive disease; NE: not evaluable; mo: months; PFS<sub>2-3</sub>: progression-free survival from 2<sup>nd</sup> line start to progression or death during 3<sup>rd</sup> line.*

**Caption:** Best objective response and median progression-free survival (PFS) using RECIST 1.1 by investigator with nivolumab received in second line, cabozantinib received in third line, and nivolumab-cabozantinib sequence (PFS<sub>2-3</sub> only) according to duration of VEGFR-TKI treatment in first line.

## Supplementary figures

Figure S1 – Propensity score distribution in overall population

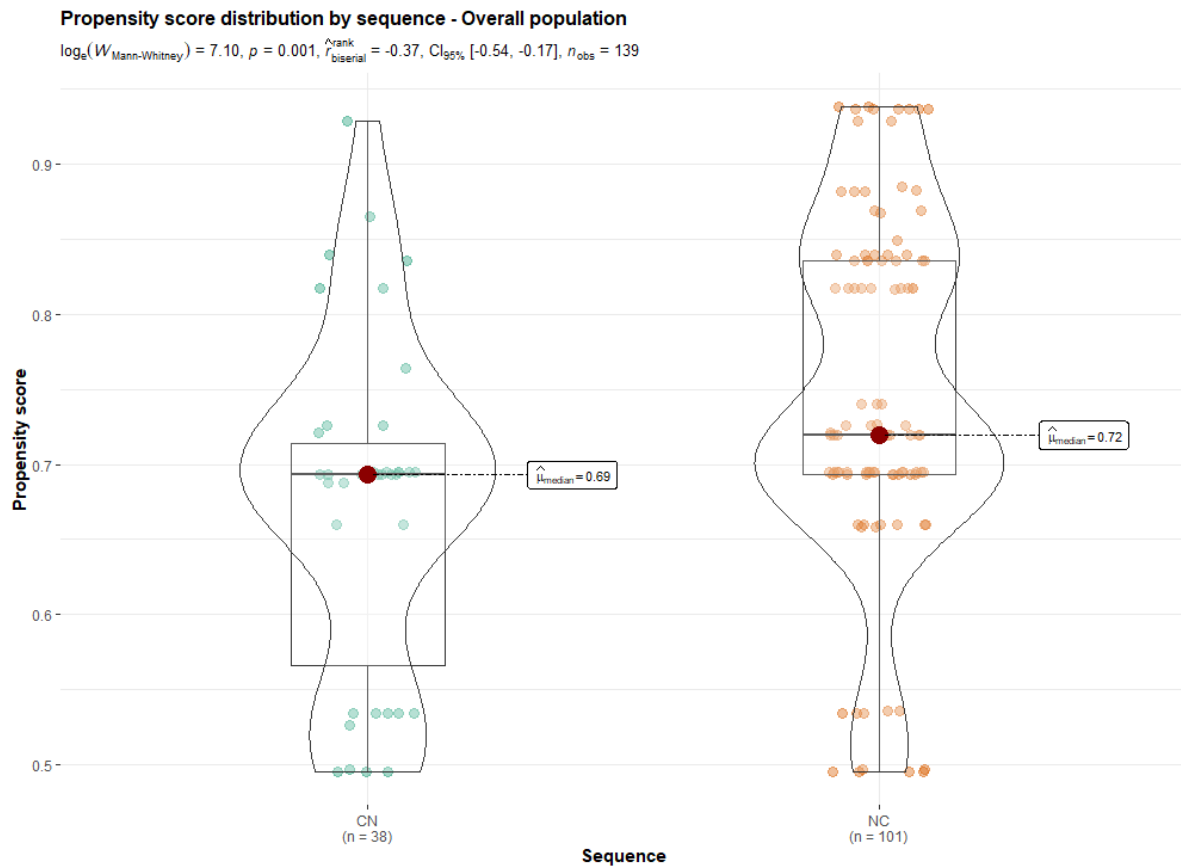

CN: cabozantinib-nivolumab sequence; NC: nivolumab-cabozantinib sequence ; PrS : propensity score.

Caption: Propensity score (PrS) is calculated from logistic regression. The distribution of PrS in each arm must have some overlapping values for the matching to be performed. Here, plots show that overlapping was sufficient to match each patient of the CN sequence with a patient of the NC sequence.

**Figure S2 – Propensity score distribution in matched population**

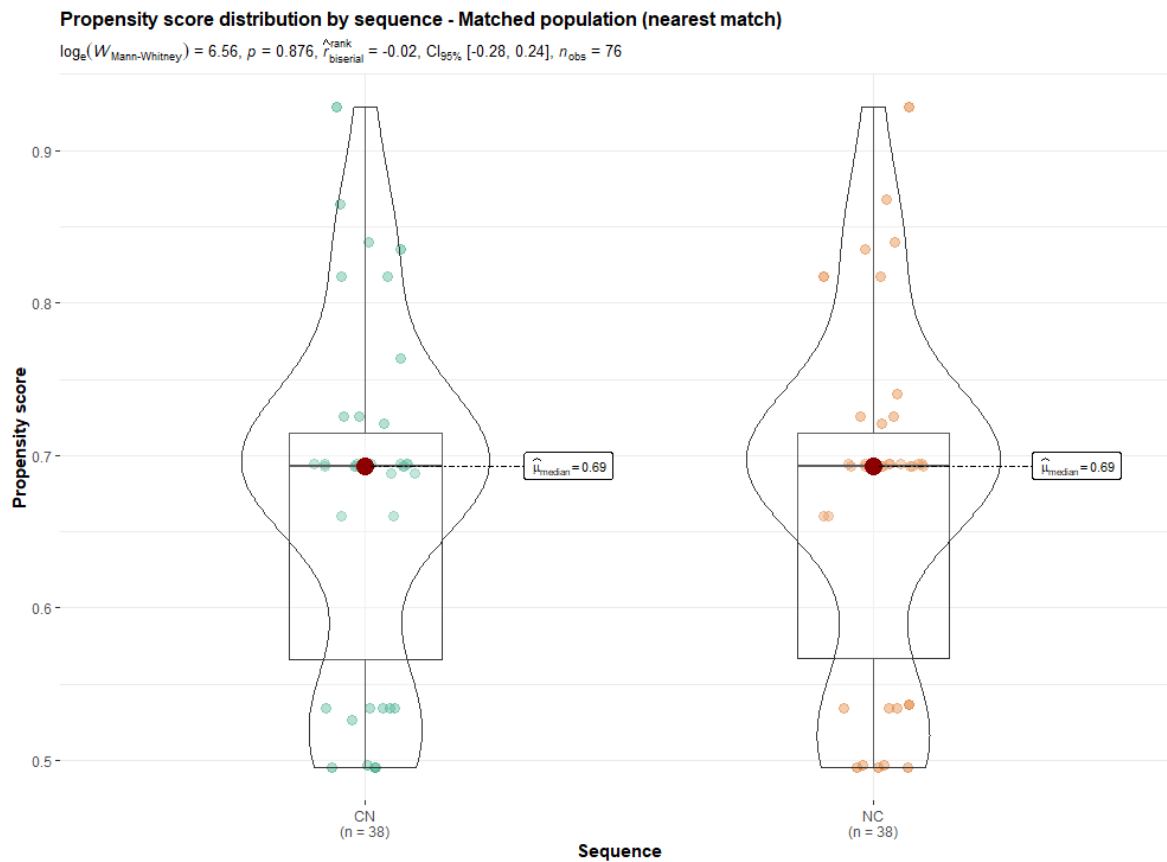

CN: cabozantinib-nivolumab sequence; NC: nivolumab-cabozantinib sequence; PrS : propensity score.

**Caption:** Plot showing distribution of propensity score (PrS) in each arm after matching. When matching is done on the PrS, baseline characteristics included in the PrS model should be balanced.

**Figure S3** –Overall survival in 2<sup>nd</sup> line (OS<sub>2</sub>) in matched 1:1 population

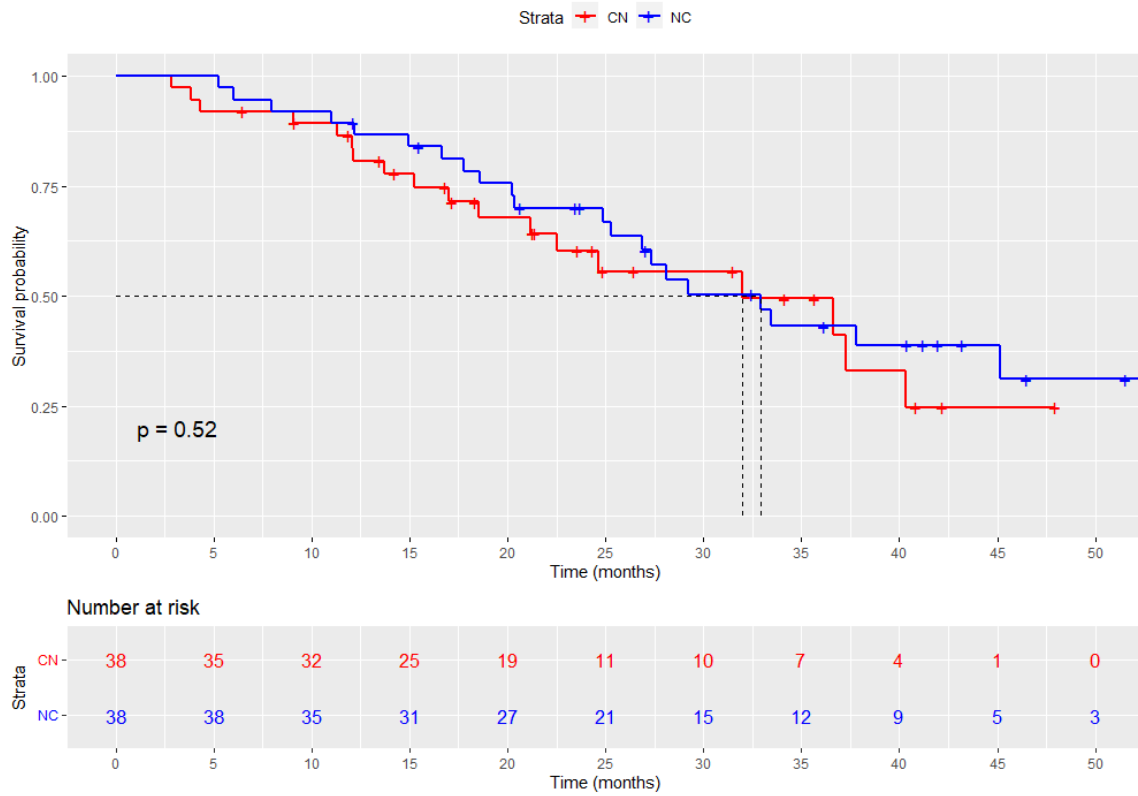

CN: cabozantinib-nivolumab sequence; NC: nivolumab-cabozantinib sequence.

**Caption:** Kaplan-Meier curve of overall survival from 2<sup>nd</sup> line in matched (1:1) population (n=38). The red curve represents the cabozantinib-nivolumab (CN) sequence and the blue curve represents the nivolumab-cabozantinib sequence.

**Figure S4** –Overall survival in 2<sup>nd</sup> line (OS<sub>2</sub>) by 1<sup>st</sup> line duration subgroups in matched 1:1 population

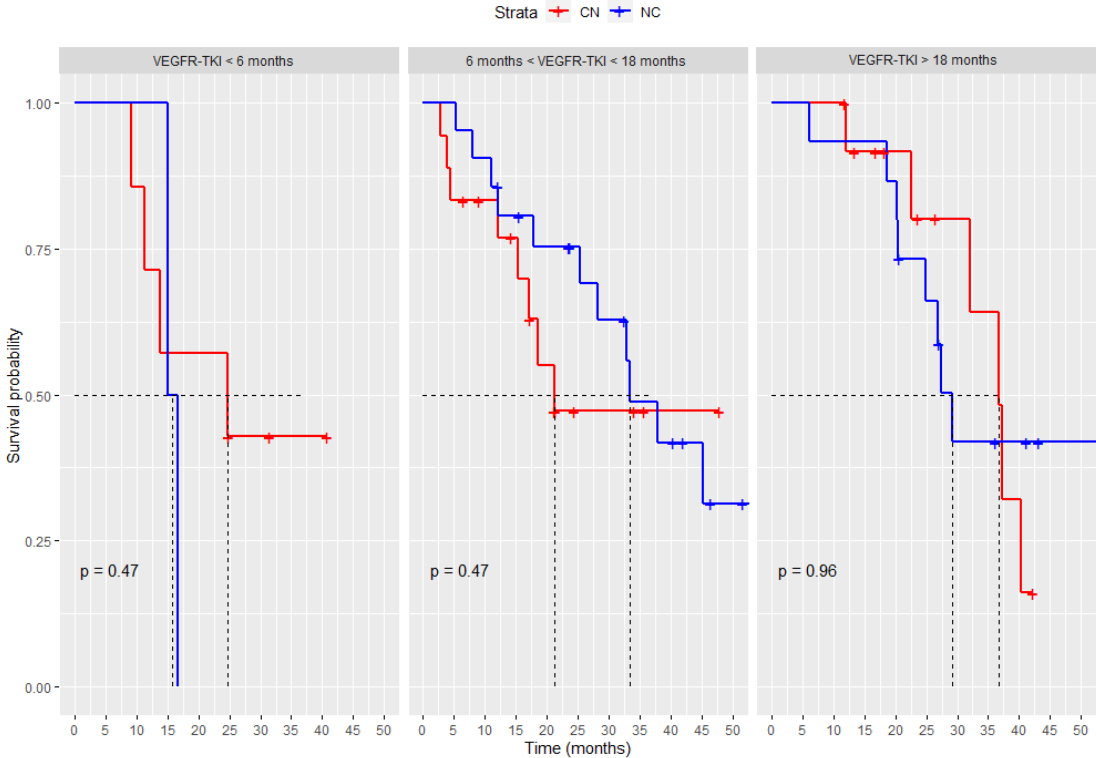

CN: cabozantinib-nivolumab sequence; NC: nivolumab-cabozantinib sequence.

**Caption:** Kaplan-Meier curve of overall survival from 2<sup>nd</sup> line in matched (1:1) population (n=38) according to duration of 1<sup>st</sup> line VEGFR-TKI treatment.

Left panel: 1<sup>st</sup> line duration < 6 months; middle panel: 1<sup>st</sup> line duration >6 months and <18 months; right panel: 1<sup>st</sup> line duration >18 months.

The red curve represents the cabozantinib-nivolumab (CN) sequence and the blue curve represents the nivolumab-cabozantinib sequence.
